# Supplementary material
Source: publisher figshare collection journal article supplement (https://karger.figshare.com/ndownloader/files/30749716)
Supplement: Supplementary file 1 [file 30749716]

| **Variables** | **statistic** | **p-value** |
| --- | --- | --- |
| hSREBF2meA | 0.677 | 0.000 |
| hSREBF2meB | 0.257 | 0.000 |
| hSREBF2meC | 0.698 | 0.000 |
| hSREBF2meD | 0.591 | 0.000 |
| hSREBF2meE | 0.750 | 0.000 |
| hSREBF2meF | 0.579 | 0.000 |
| hSREBF2meG | 0.942 | 0.315 |
| hSREBF2meH | 0.579 | 0.000 |
| hSREBF2meI | 0.407 | 0.000 |

**Supplementary Table 1 legend.** Shapiro-Wilk test results to test the data for normality. If the p-value is less than 0.05, there is evidence that the data tested are not normally distributed.
